# Supplementary material
Source: PubMed Central journal article supplement (PMC3689958)
Supplement: supp_M112.436584_jbc.M112.436584-1.pdf [file supp_M112.436584_jbc.M112.436584-1.pdf]

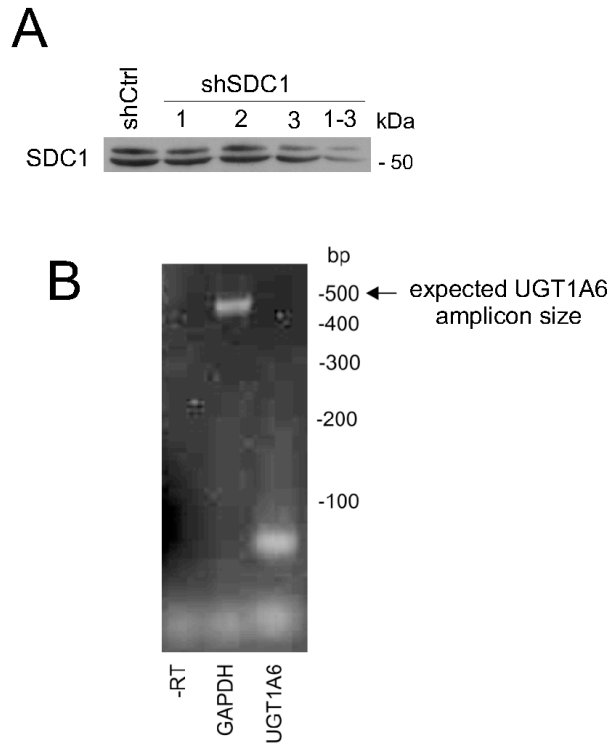

**Supplementary FIGURE 1.** A. Lack of syndecan-1 knockdown with individual shRNAs, and only partial knockdown with pooled shRNAs. HCE-T cells were transduced in Opti-MM medium (Life Technologies; Carlsbad, CA) with lentiviral particles encoding individual or pooled shRNA's directed to human syndecan-1 (Dharmacon, Waltham MA). Transduced cells were selected with puromycin in DMEM/F12. Lysates were collected and blotted for syndecan-1 using mab B-B4. B. No apparent UGT1A6 mRNA expression by HCE-T cells, as revealed by RT-PCR. Expected UGT1A6 amplicon is ~500 bp. Shown also are negative (-RT) and positive (GAPDH) controls. RT-PCR (Retroscript Kit, Life Technologies) was performed from HCE-T total RNA (purified using RNAqueous-4PCR kit, Life Technologies). Two different primer pairs (below) were assayed, with similar negative results (shown is the result with the first pair). RT-PCR utilized the Retroscript Kit, Life Technologies) following the manufacturer's instructions. PCR cycles were: 1x at 95 C for 5 min; 35x at 94 C for 30 sec, at 55 C for 30 sec, at 72 C for 45 sec, and 1x at 72C for 10 min.

Primer pairs

UGT1A6-2F: CCT TCA TCA CCT TTA AAT GTT GTG  
 UGT1A6-2R: CAA TTG CAA CCA TCT GCA GAA GCC

UGT1A6-F: ATG GCC TGC CTC CTT CGC TCA TT  
 UGT1A6-R: CCA TTG ATC CCA AAG AGA AAA CC
